# Supplementary material for: The Role of Rehabilitation in Arterial Function Properties of Convalescent COVID-19 Patients
Source: MDPI journal article supplement (doi:10.3390/jcm12062233), 2023-03-13
Supplement: s1 [file s1]

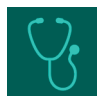

**Table S1.** Baseline characteristics of the study population.

|                          | <b>Convalescent COVID-19</b><br><b>(n = 60)</b> | <b>Controls</b><br><b>(n = 60)</b> | <b>p</b> |
|--------------------------|-------------------------------------------------|------------------------------------|----------|
| Age, years               | 52.2 (12.3)                                     | 55.3 (9.8)                         | 0.14     |
| Male sex, %              | 29 (48.3)                                       | 32 (53.3)                          | 0.58     |
| BMI, kg/m <sup>2</sup>   | 28.5 (3.2)                                      | 27.4 (4.8)                         | 0.15     |
| Smoking, %               | 24 (40)                                         | 22 (37)                            | 0.71     |
| Diabetes mellitus, %     | 4 (6.7)                                         | 1 (1.7)                            | 0.18     |
| Hypertension, %          | 13 (21.7)                                       | 19 (20.0)                          | 0.82     |
| Dyslipidemia, %          | 22 (36.7)                                       | 19 (31.7)                          | 0.56     |
| Interleukin-6, pg/ml     | 1.74 (0.64, 4.97)                               | 1.31 (0.98, 2.70)                  | 0.95     |
| <b>Vascular function</b> |                                                 |                                    |          |
| FMD, %                   | 6.1 (1.9)                                       | 7.4 (3.2)                          | 0.02     |
| PWV, m/s                 | 8.4 (1.6)                                       | 7.3 (0.8)                          | <0.001   |
| AIx, %                   | 26.5 (9.5)                                      | 23.4 (8.5)                         | 0.08     |

BMI: body mass index, FMD: flow-mediated dilation, PWV: pulse wave velocity, AIx: augmentation index. Continuous variables are presented as mean (standard deviation) or as median (25th, 75th quartile) according to their distribution. Categorical variables are presented as frequency (percentage). The Mann-Whitney U or the *t*-test were used to assess the between group differences in continuous variables. The  $\chi^2$  test was used to assess the between group differences in categorical variables.
